# Supplementary material for: Multi Locus Sequence Typing of Chlamydia Reveals an Association between Chlamydia psittaci Genotypes and Host Species
Source: PLoS One. 2010 Dec 2;5(12):e14179. doi: 10.1371/journal.pone.0014179 (PMC2996290; doi:10.1371/journal.pone.0014179)
Supplement: Table S1 — All isolates used in this study according to Chlamydia species, host and ST. (0.12 MB XLS) [file pone.0014179.s001.xls]

## Sheet: Blad1
id	isolate	species	host	gatA	oppA	hflX	gidA	enoA	hemN	fumC	ST	year of isolation	country of isolation	OmpA genotype/serotype
45	Nigg	Chlamydia muridarum	mouse	8	11	9	11	11	7	8	22
1	B/TW5	Chlamydia trachomatis	human	1	3	3	3	2	2	3	2
2	L1/440-L	Chlamydia trachomatis	human	1	3	3	3	2	2	2	11
3	L2/434-B	Chlamydia trachomatis	human	1	3	3	3	2	2	19	44
4	L3/404-L	Chlamydia trachomatis	human	1	3	3	3	2	2	19	44
5	E/DK-20	Chlamydia trachomatis	human	2	1	1	2	4	2	3	8
6	F/MRC-301	Chlamydia trachomatis	human	2	2	1	2	4	2	3	7
7	D/IC-CAL-8	Chlamydia trachomatis	human	3	1	1	2	4	2	3	4
8	D'	Chlamydia trachomatis	human	3	1	1	2	4	2	3	4
9	E7a	Chlamydia trachomatis	human	3	1	1	2	4	2	3	4
10	E12a	Chlamydia trachomatis	human	3	1	1	2	4	2	3	4
11	E4a	Chlamydia trachomatis	human	3	1	1	2	4	2	3	4
12	Da/mt-566	Chlamydia trachomatis	human	3	3	2	5	3	2	1	5
13	I/UW-12	Chlamydia trachomatis	human	3	3	2	5	3	2	1	5
14	K/UW-31	Chlamydia trachomatis	human	3	3	2	5	3	1	3	6
15	E11a	Chlamydia trachomatis	human	3	3	2	5	3	1	3	6
16	G/IOL-238	Chlamydia trachomatis	human	3	3	2	4	3	2	3	9
17	J/UW-36	Chlamydia trachomatis	human	3	3	2	4	3	2	3	9
18	H/UW-4	Chlamydia trachomatis	human	3	3	2	1	3	2	3	10
19	D/UW-3CX	Chlamydia trachomatis	human	3	3	2	5	3	2	3	13
20	A/Sa-1	Chlamydia trachomatis	human	3	3	4	5	1	2	3	1
21	Ba/Apache-2	Chlamydia trachomatis	human	3	3	4	5	3	2	3	3
22	C/UW-1	Chlamydia trachomatis	human	3	3	4	5	3	2	3	3
23	E10a	Chlamydia trachomatis	human	3	4	1	2	4	2	3	12
24	D-	Chlamydia trachomatis	human	3	5	2	5	3	1	3	15
25	I'	Chlamydia trachomatis	human	3	6	2	5	3	1	3	14
66	A/HAR-13	Chlamydia trachomatis	human	3	3	4	5	3	2	3	3
88	1553	Chlamydia trachomatis	human	3	1	1	2	4	2	3	4
99	Sweden2	Chlamydia trachomatis	human	3	1	1	2	4	2	3	4
100	B/Jali20/OT	Chlamydia trachomatis	human	3	3	4	20	3	2	3	45
101	B/TZ1A828/OT	Chlamydia trachomatis	human	3	3	4	5	3	2	3	3
102	L2b/UCH-1/proctitis	Chlamydia trachomatis	human	1	3	3	3	2	2	19	44
105	10545	Chlamydia trachomatis	human	3	1	1	2	4	2	3	4
106	695	Chlamydia trachomatis	human	3	1	1	2	4	2	3	4
107	104	Chlamydia trachomatis	human	3	4	1	2	4	2	3	12
108	414	Chlamydia trachomatis	human	3	1	1	2	4	2	3	4
109	534	Chlamydia trachomatis	human	3	1	1	2	4	2	3	4
110	598	Chlamydia trachomatis	human	3	1	1	2	4	2	3	4
111	634	Chlamydia trachomatis	human	3	1	1	2	4	2	3	4
112	262	Chlamydia trachomatis	human	3	1	1	2	4	2	3	4
113	532	Chlamydia trachomatis	human	3	1	1	2	4	2	3	4
114	703	Chlamydia trachomatis	human	3	1	1	2	4	2	3	4
115	415	Chlamydia trachomatis	human	3	1	1	2	4	2	3	4
116	2811	Chlamydia trachomatis	human	3	3	2	4	3	2	3	9
117	4873	Chlamydia trachomatis	human	3	3	2	5	3	1	3	6
118	1490	Chlamydia trachomatis	human	3	3	2	5	3	1	3	6
119	257	Chlamydia trachomatis	human	3	3	2	5	3	2	3	13
120	267	Chlamydia trachomatis	human	3	3	2	5	3	1	3	6
121	187	Chlamydia trachomatis	human	3	3	2	5	3	2	3	13
122	378	Chlamydia trachomatis	human	3	3	2	5	3	1	3	6
123	906	Chlamydia trachomatis	human	3	3	2	5	3	1	3	6
124	154	Chlamydia trachomatis	human	3	3	2	5	3	1	3	6
125	885	Chlamydia trachomatis	human	3	3	2	5	3	2	3	13
126	1931	Chlamydia trachomatis	human	3	3	2	5	3	2	3	13
127	553	Chlamydia trachomatis	human	3	3	2	4	3	2	3	9
128	120	Chlamydia trachomatis	human	3	3	2	5	3	15	3	39
129	44	Chlamydia trachomatis	human	3	3	19	4	3	2	3	42
130	202	Chlamydia trachomatis	human	3	1	2	2	4	2	3	38
131	37	Chlamydia trachomatis	human	3	1	2	2	4	2	3	38
132	613	Chlamydia trachomatis	human	3	1	2	2	4	2	3	38
133	123	Chlamydia trachomatis	human	3	1	2	2	4	2	3	38
42	S26/3	Chlamydia abortus	sheep	5	8	6	8	8	4	5	19		Scotland, UK
48	FAG	Chlamydia abortus	goat	5	8	6	8	8	4	5	19		Macedonia, Greece
49	MB/312	Chlamydia abortus	goat	5	8	6	8	8	4	5	19		Attica, Greece
50	VPIG	Chlamydia abortus	goat	5	8	6	8	8	4	5	19		Macedonia, Greece
51	B577	Chlamydia abortus	sheep	5	8	6	8	8	4	5	19		USA (ATCC)
52	A22	Chlamydia abortus	sheep	5	8	6	8	8	4	5	19		Scotland, UK
53	AB7	Chlamydia abortus	sheep	5	8	6	8	8	4	5	19		France
54	FAS	Chlamydia abortus	sheep	5	8	6	8	8	4	5	19		Macedonia, Greece
55	MA/231184	Chlamydia abortus	sheep	5	8	6	8	8	4	5	19		Macedonia, Greece
56	MD/3920	Chlamydia abortus	sheep	5	8	6	8	8	4	5	19		greece
57	ME/4004	Chlamydia abortus	sheep	5	8	6	8	8	4	5	19		Attica, Greece
58	MF/377	Chlamydia abortus	.	5	8	6	8	8	4	5	19
59	1B	Chlamydia abortus	sheep	18	8	6	8	8	14	5	25		France
60	Krauss-15	Chlamydia abortus	caprine	5	8	6	8	8	4	18	29		Tunisia
61	LLG	Chlamydia abortus	goat	13	18	6	19	16	4	17	30		Macedonia, Greece
62	POS	Chlamydia abortus	sheep	13	18	6	19	16	4	17	30		Macedonia, Greece
43	GPIC	Chlamydia caviae	cavia	6	9	7	9	9	5	6	20	1964
44	Fe/C-56	Chlamydia felis	cat	7	10	8	10	10	6	7	21
46	E58	Chlamydia pecorum	calf	9	12	10	12	12	8	9	23
26	GRO-21	Chlamydia pneumoniae	human	4	7	5	6	5	3	4	16
27	NWL-1	Chlamydia pneumoniae	human	4	7	5	6	5	3	4	16
28	AR-39	Chlamydia pneumoniae	human	4	7	5	6	5	3	4	16
29	CM-1	Chlamydia pneumoniae	human	4	7	5	6	5	3	4	16
30	AR-338	Chlamydia pneumoniae	human	4	7	5	7	6	3	4	17
31	BAL-16	Chlamydia pneumoniae	human	4	7	5	7	6	3	4	17
32	CWL-011	Chlamydia pneumoniae	human	4	7	5	7	6	3	4	17
33	CWL-029	Chlamydia pneumoniae	human	4	7	5	7	6	3	4	17
34	CWL-50	Chlamydia pneumoniae	human	4	7	5	7	6	3	4	17
35	K-7	Chlamydia pneumoniae	human	4	7	5	7	6	3	4	17
36	TW-183	Chlamydia pneumoniae	human	4	7	5	7	6	3	4	17
37	UZG-1	Chlamydia pneumoniae	human	4	7	5	7	6	3	4	17
38	2023	Chlamydia pneumoniae	human	4	7	5	7	6	3	4	17
39	2043	Chlamydia pneumoniae	human	4	7	5	7	6	3	4	17
40	PS-32	Chlamydia pneumoniae	human	4	7	5	7	6	3	4	17
41	H12	Chlamydia pneumoniae	human	4	7	5	7	7	3	4	18
103	LPCoLN	Chlamydia pneumoniae	koala	19	19	5	21	17	16	4	46
104	J138	Chlamydia pneumoniae	human	4	7	5	6	5	3	4	16
47	6BC	Chlamydia psittaci	parakeet	10	13	11	13	13	9	10	24	1941	California, USA	A
63	90/1051	Chlamydia psittaci	Amazon parot	10	13	11	13	13	9	10	24	1990	Belgium	A
64	84_55	Chlamydia psittaci	Budgerigar	10	13	11	13	13	9	10	24	2001	Germany	A
65	89/1291	Chlamydia psittaci	Budgerigar	10	13	11	13	13	9	10	24	1989	Belgium	A
67	91/0154	Chlamydia psittaci	Budgerigar	10	13	11	13	13	9	10	24	1991	Belgium	A
68	2000_2675	Chlamydia psittaci	Eastern Rosella	10	13	11	13	13	9	10	24	2000	Italy	sv A
69	99_3005	Chlamydia psittaci	Elegant Parrot	10	13	11	13	13	9	10	24	1999	Italy	A
70	06/020	Chlamydia psittaci	parakeet	10	13	11	13	13	9	10	24	2006	Belgium	A
71	06/052	Chlamydia psittaci	parakeet	10	13	11	13	13	9	10	24	2006	Belgium	A
72	VS1	Chlamydia psittaci	Parrot	10	13	11	13	13	9	10	24	1985	Georgia, USA	A
73	95_99	Chlamydia psittaci	Peach-faced Lovebird	10	13	11	13	13	9	10	24	1995	Italy	A + E/B
74	2000_332	Chlamydia psittaci	Scarlet Macaw	10	13	11	13	13	9	10	24	2000	Italy	A
75	91/0237	Chlamydia psittaci	Senegal Parakeet	10	13	11	13	13	9	10	24	1991	Belgium	A
77	96_3218	Chlamydia psittaci	pigeon	11	14	15	14	13	9	13	26	1996	Italy	sv B
78	98_6098	Chlamydia psittaci	pigeon	11	14	15	14	13	9	13	26	1998	Italy	B
79	CP3	Chlamydia psittaci	pigeon	11	14	15	14	13	9	11	27	1957	California, USA	B
80	07/008	Chlamydia psittaci	pigeon	11	14	15	14	13	9	11	27	2007	Belgium	B
81	GR9(GD)	Chlamydia psittaci	duck	12	13	11	13	13	9	12	28	1960	Europe	C
82	humaan E	Chlamydia psittaci	human	12	13	11	13	13	9	12	28	2005	Belgium	E
83	18_290800	Chlamydia psittaci	duck	12	13	11	13	13	9	12	28	2000	Germany	E/B
84	3/20901	Chlamydia psittaci	duck	12	13	11	13	13	9	12	28	2001	Germany	E/B
85	4_20901	Chlamydia psittaci	duck	12	13	11	13	13	9	12	28	2001	Germany	E/B
86	5_20901	Chlamydia psittaci	duck	12	13	11	13	13	9	12	28	2001	Germany	E/B
87	2/290300	Chlamydia psittaci	duck	12	13	11	13	13	9	12	28	2000	Germany	E/B
89	WS_RTE_3002_09_01	Chlamydia psittaci	duck	12	13	11	13	13	9	12	28	2001	Germany	E/B
90	M56	Chlamydia psittaci	muskrat	17	17	17	18	13	12	16	31	1961	Saskatchewan, Canada	M56
91	WC	Chlamydia psittaci	bovine	12	13	13	13	13	13	10	32	1963		WC
92	96_1867_30	Chlamydia psittaci	pigeon	11	14	14	17	13	11	13	34	1996	Italy	sv B
93	CPMN	Chlamydia psittaci	human	11	14	15	14	13	11	13	35	1934	USA	E
94	99_3759_2	Chlamydia psittaci	pigeon	11	14	15	14	13	11	13	35	1999	Italy	E
95	84_2334	Chlamydia psittaci	Yellow-crowned amazon	13	15	12	15	14	4	14	36	1984	Germany
96	NJ1	Chlamydia psittaci	turkey	15	16	13	16	13	10	15	37	1954	New Jersey, USA	D
97	VS225	Chlamydia psittaci	parakeet	12	13	18	13	13	9	10	41	1991	Texas, USA	F
98	92_1293	Chlamydia psittaci	turkey	15	16	13	16	15	10	15	43	1992	the Netherlands	D
id corresponds to id in the Chlamydiales MLST database at http://pubmlst.org/ chlamydiales/
